# Supplementary material
Source: publisher figshare collection journal article supplement (https://tandf.figshare.com/ndownloader/files/17210693)
Supplement: Supplementary file 1 [file 17210693]

# Electronic supplementary information (ESI)

Core-Shell Ag-Molecularly Imprinted Composite for SERS Detection of Carbendazim

Emily C. Cheshari1, 2, Xiaohui Ren 1, and Xin Li 1*

1MIIT Key Laboratory of Critical Materials Technology for New Energy Conversion and Storage, School of Chemistry and Chemical Engineering, State Key Lab of Urban Water Resource and Environment, Harbin Institute of Technology, Harbin 150090, China

2 Chemistry and Biochemistry Department, School of Science and Applied Technology, Laikipia University, 20300-1100, Nyahururu-Kenya

**Figure S1.** SEM images of Ag@SiO2 (a) and Ag@SiO2 –MIP (b)

**Figure S2.** Structures of Carbendazim and Sulfamethazine

**Figure S3.** Ag@SiO2-MIP spectra of Sulfamethazine 1x 10-3 range of (a) 0 cm-1 - 3500 cm-1

**Figure S4**. Comparison of regression lines obtained for water or acetonitrile was used as solvent at 1550 cm-1 (A) and 2135 cm−1 (B)
